# Supplementary figures and images for: Translation affects mRNA stability in a codon-dependent manner in human cells
Source: eLife journal article supplement (doi:10.7554/elife.45396), 2019-04-23

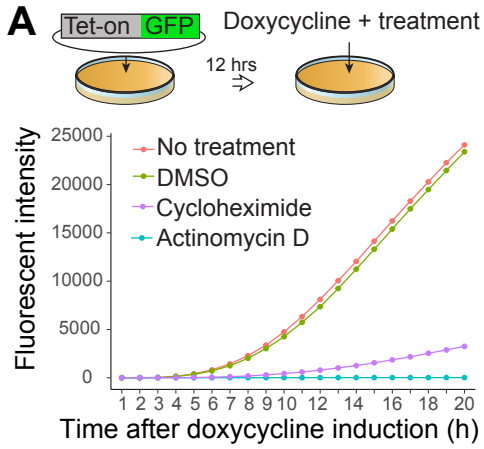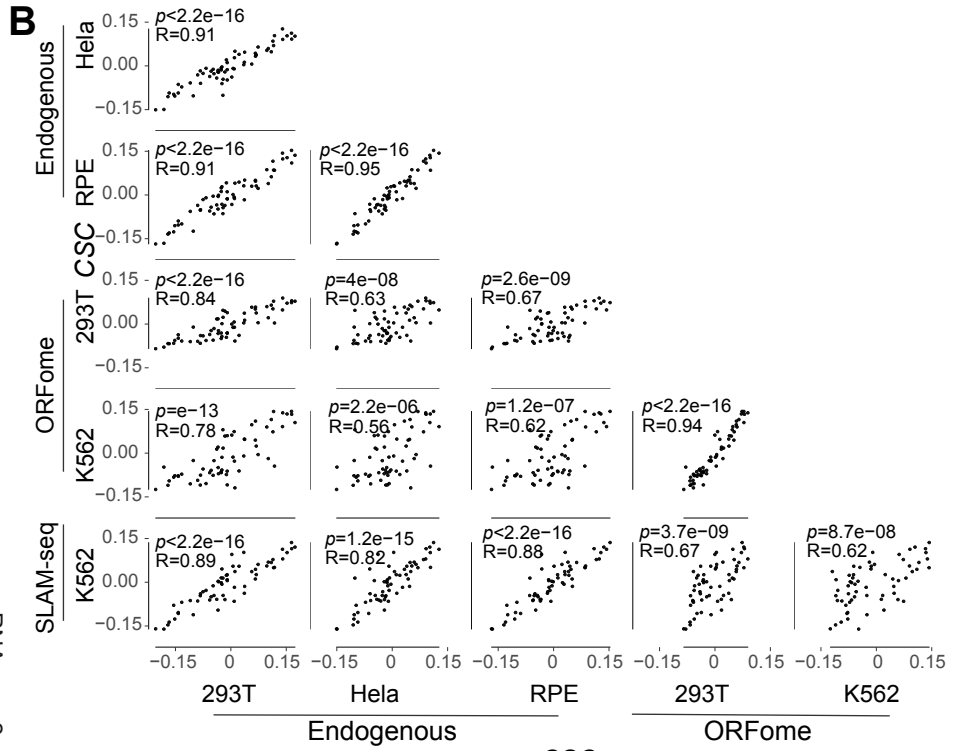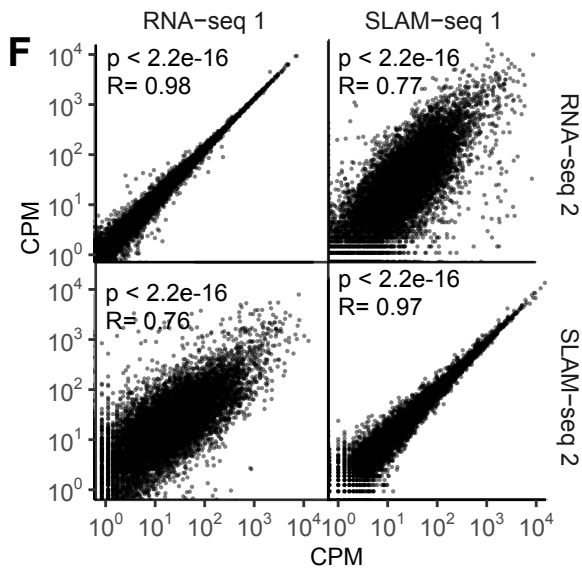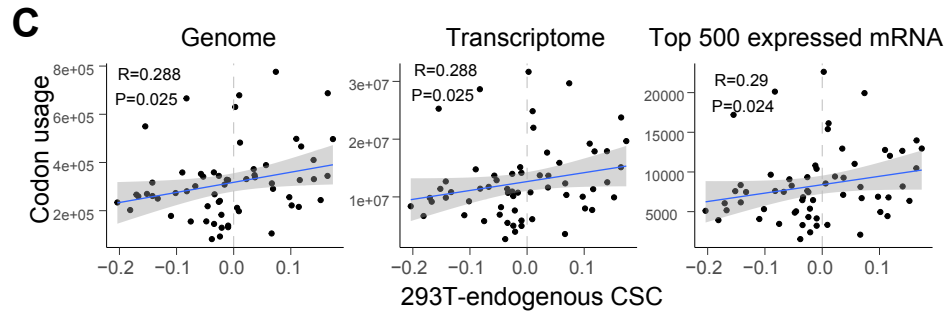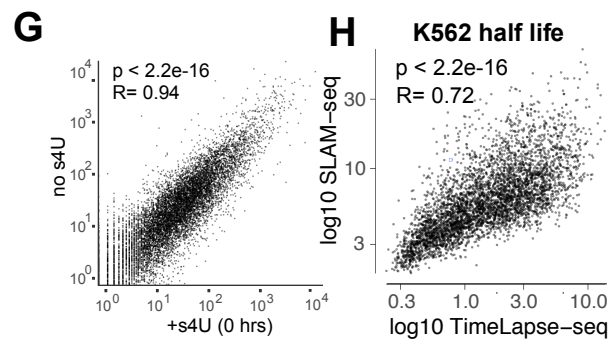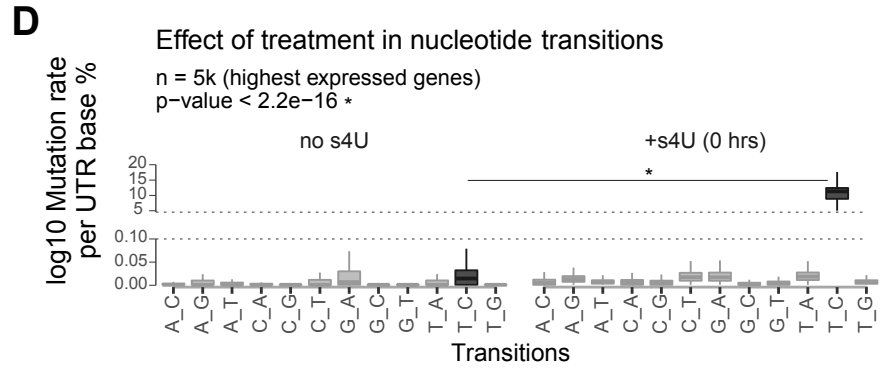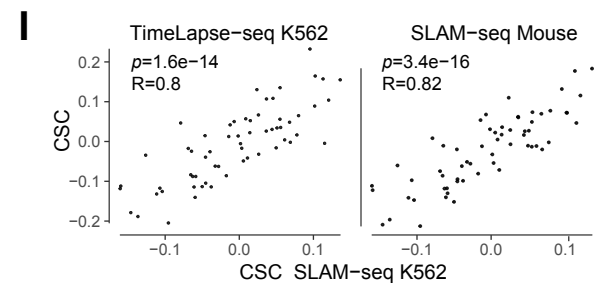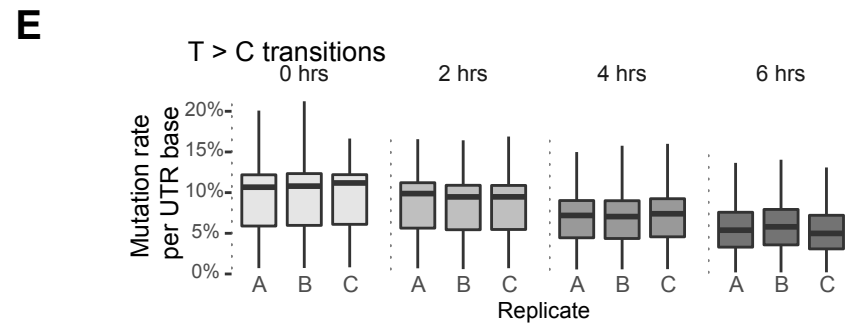

Supplement: supp [file elife-45396-supp-v1.zip]

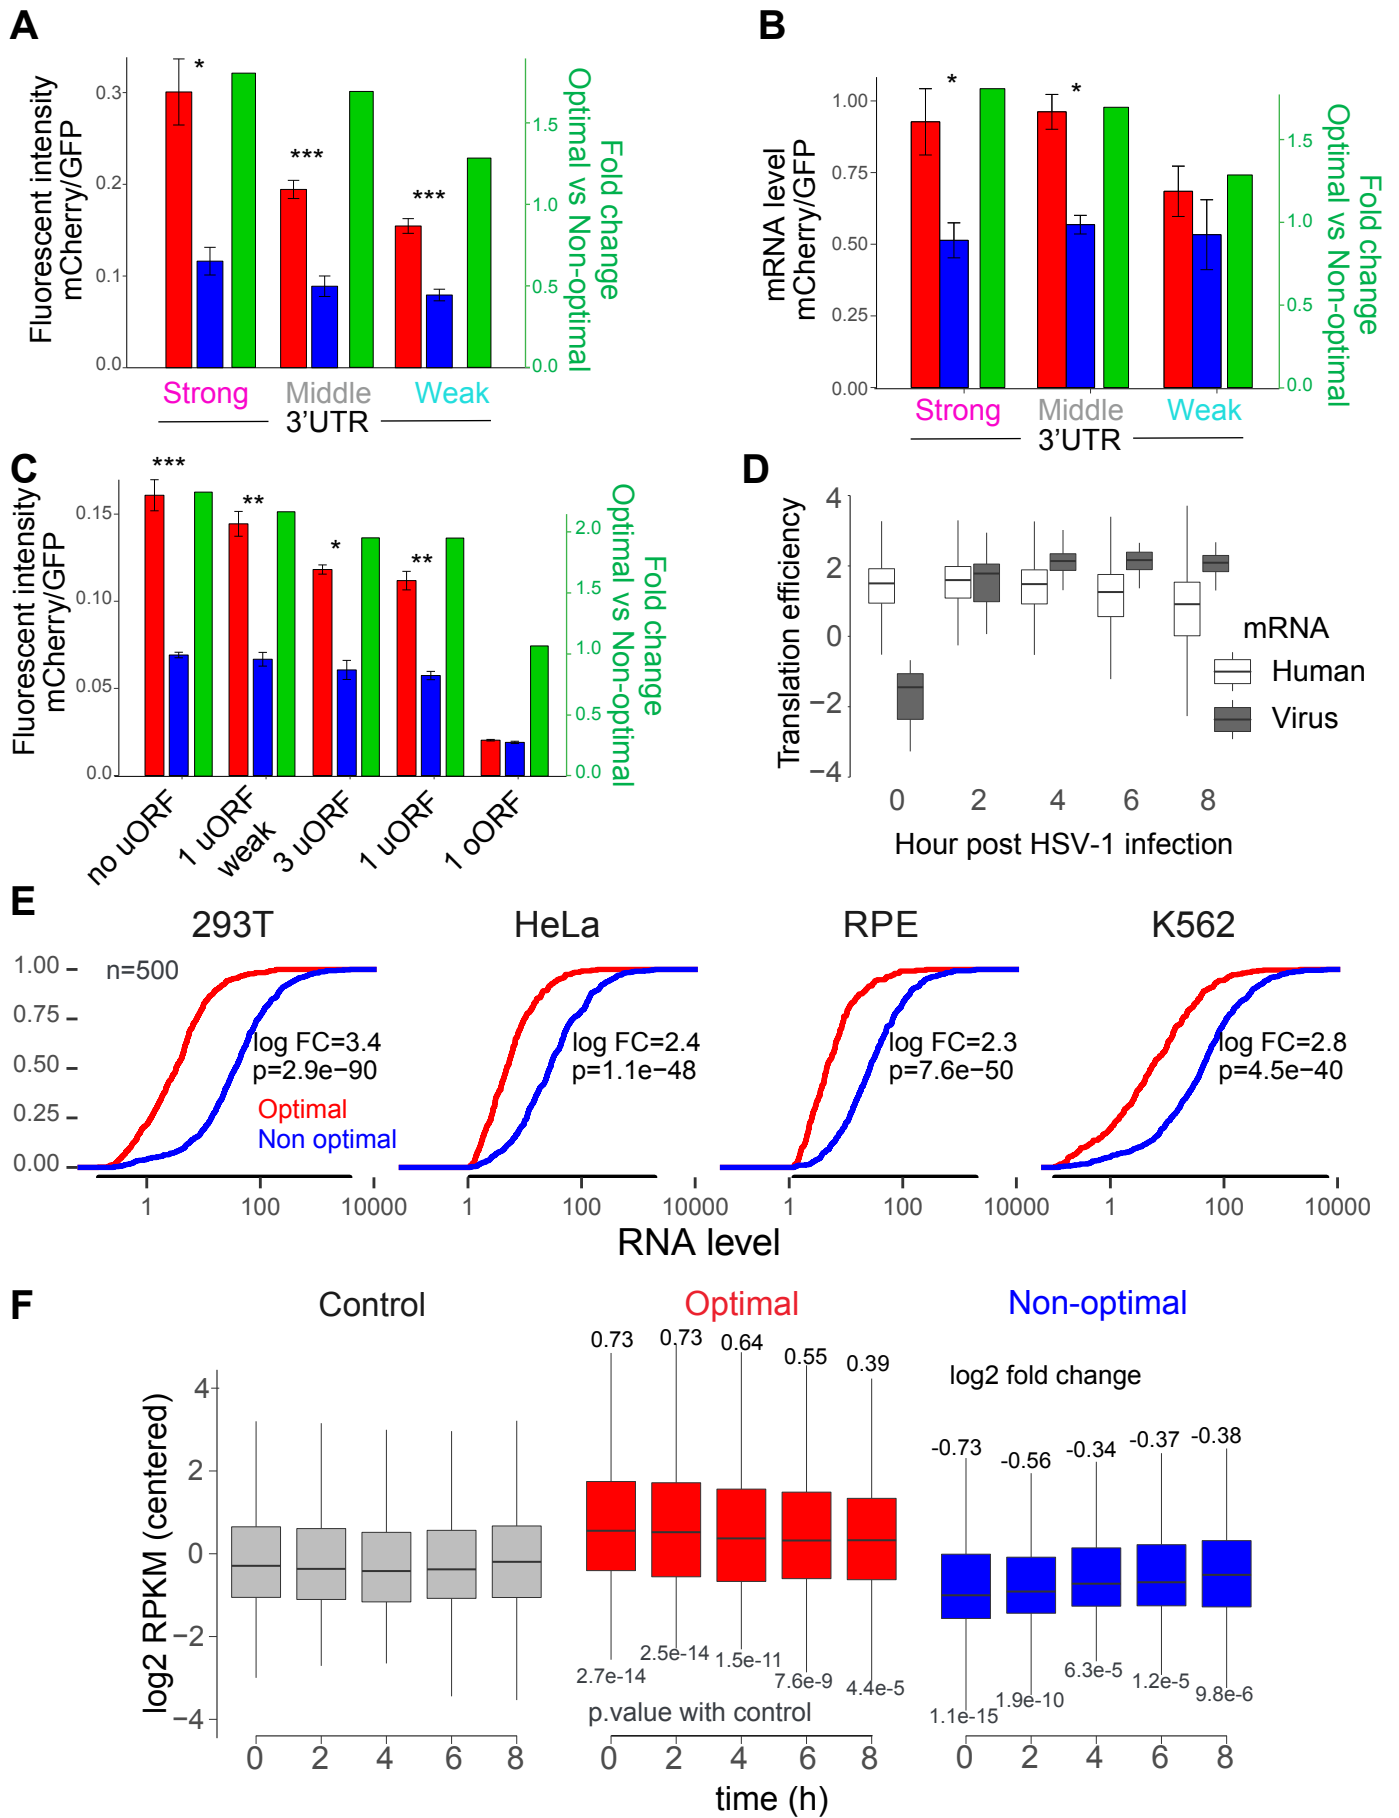

Supplement: supp [file elife-45396-supp-v1.zip]

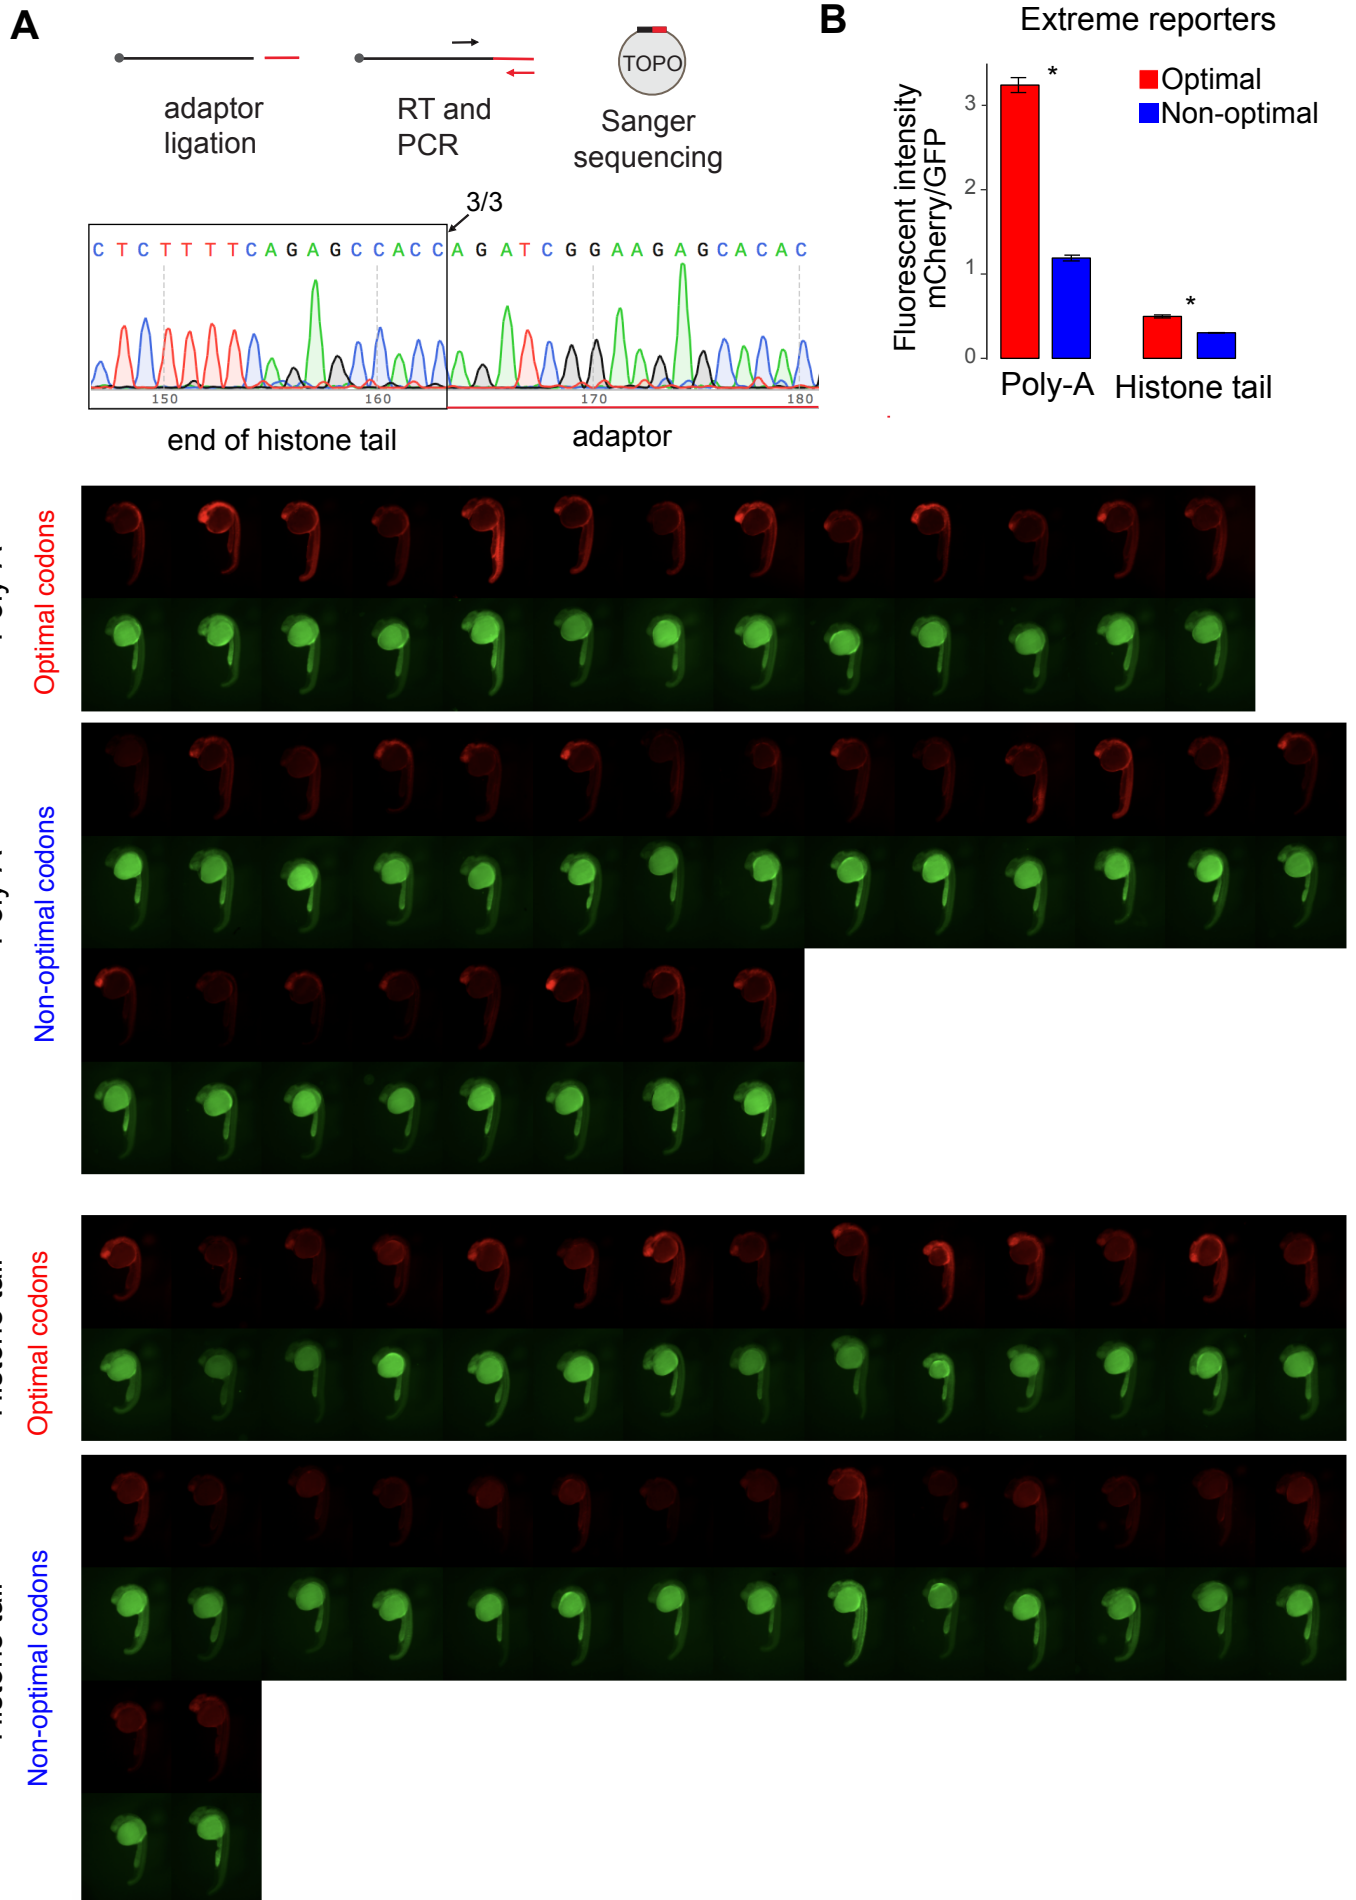

Supplement: supp [file elife-45396-supp-v1.zip]

A

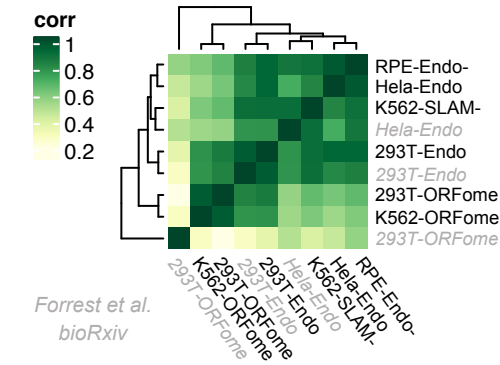

C

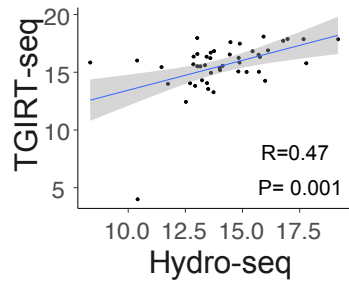

B

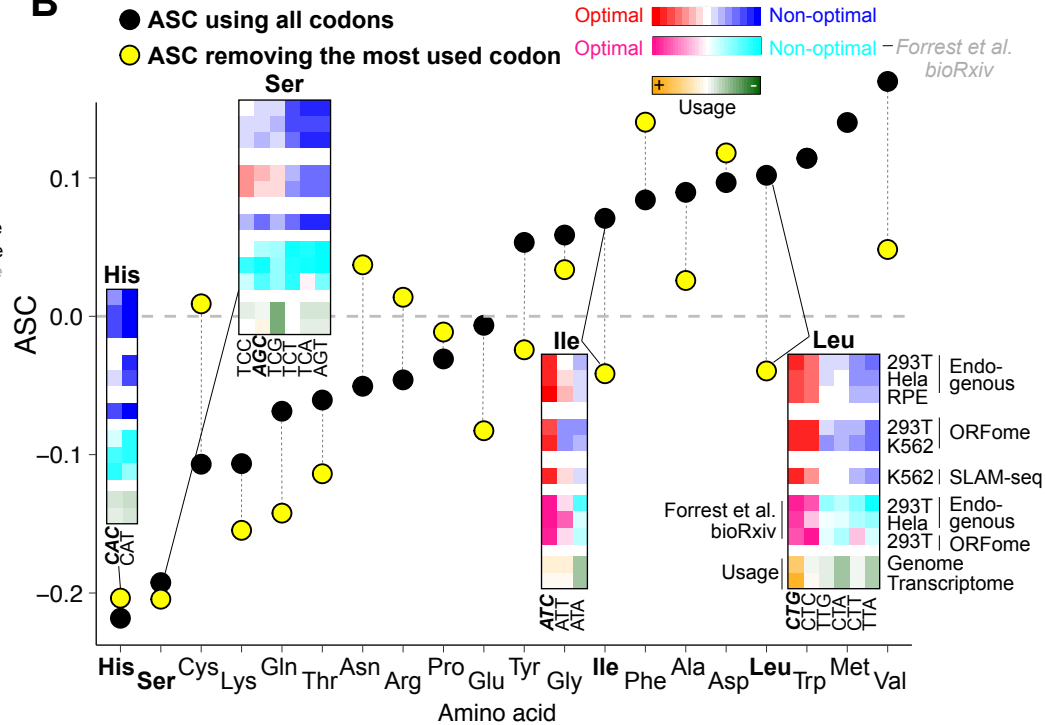

Supplement: supp [file elife-45396-supp-v1.zip]

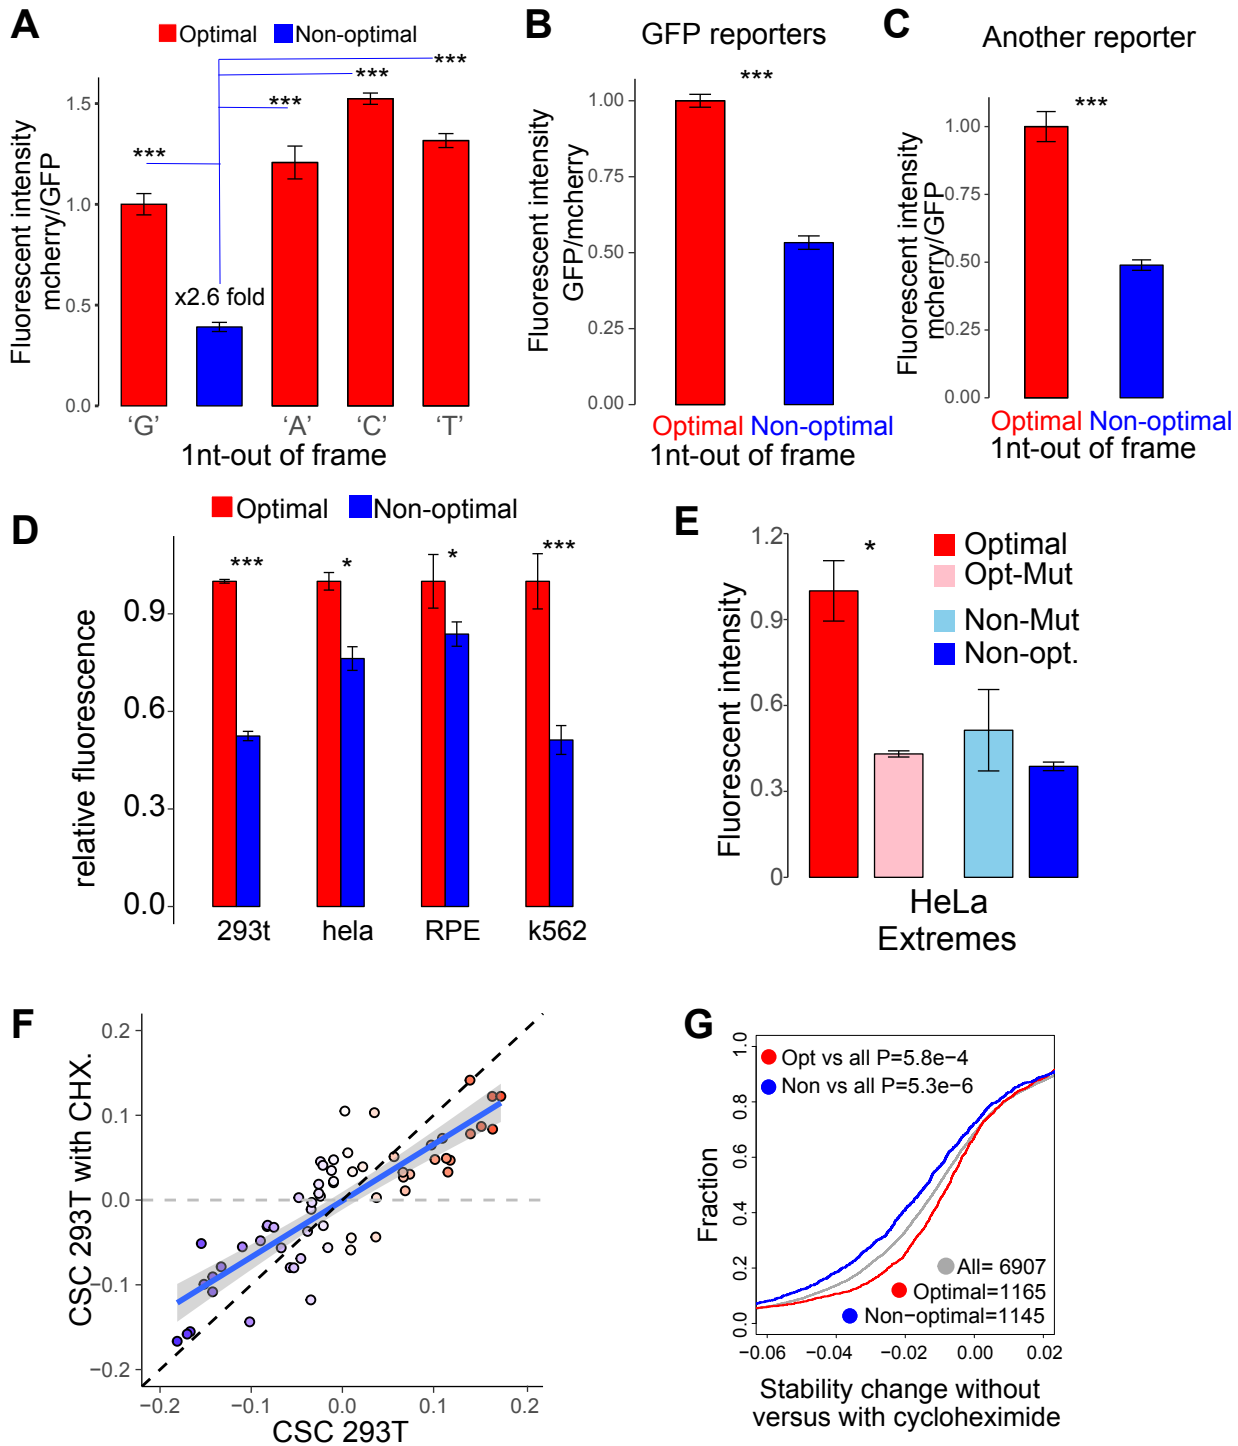

Supplement: supp [file elife-45396-supp-v1.zip]
